# Supplementary material for: Accelerated Permafrost Degradation in the Source Area of the Yellow River: Spatiotemporal Dynamics of Freeze-Thaw Indices Revealed by High-Resolution DEM-Corrected ERA5-Land Data (1981–2020)
Source: Copernicus journal article supplement (doi:10.5194/egusphere-2025-2692), 2025-10-24
Supplement: Supplementary file [file egusphere-2025-2692-AC1-supplement.pdf]

Table R1 Comparison of this study with existing high-resolution temperature/freeze–thaw related datasets.

| <b>Study/Data</b>                                                    | <b>Region</b>      | <b>Variable</b>             | <b>Spatial Resolution</b> | <b>Time Span</b> | <b>Method</b>                      | <b>Difference from This Study</b>                                                    |
|----------------------------------------------------------------------|--------------------|-----------------------------|---------------------------|------------------|------------------------------------|--------------------------------------------------------------------------------------|
| <b>Gao et al. (2023)</b>                                             | Yellow River Basin | Air temperature             | 1 km daily                | 1981–2020        | Station + RS fusion                | Air temp only; not ERA5-Land-based; no DEM lapse-rate correction.                    |
| <b>Tao et al. (2022)</b>                                             | Global             | LST                         | 1 km daily                | 2003–2020        | MODIS fusion                       | Starts 2003; not ERA5-Land-based; shorter time span.                                 |
| <b>Peng et al. (2019)</b>                                            | China              | Air temperature             | ~1 km monthly             | 1901–2017        | Statistical reconstruction         | Air temp only; not surface temperature; no ERA5-Land + DEM correction.               |
| <b>He et al. (2021)</b>                                              | China              | Air temperature             | 1 km monthly              | 1951–2020        | Machine learning                   | ML-based air temp; not LST; no physical lapse-rate calibration.                      |
| <b>ERA5 downscaling studies(Li et al., 2025)</b>                     | China/Regional     | T or LST                    | 1 km                      | Various          | Statistical / ML                   | High-resolution, but lacks explicit station-derived lapse-rate correction.           |
| <b>Other 1-km LST datasets(Liu et al., 2025; Zhang et al., 2023)</b> | China/global       | LST                         | 1 km                      | Mostly post-2000 | MODIS-based                        | Not ERA5-Land-based; limited time range.                                             |
| <b>This study</b>                                                    | SAYR               | DEM-corrected ERA5-Land LST | 1 km monthly              | 1981–2020        | Physical DEM lapse-rate correction | First 1981–2020 ERA5-Land LST with explicit monthly lapse-rate calibration for SAYR. |
