# Supplementary material for: Accelerated Permafrost Degradation in the Source Area of the Yellow River: Spatiotemporal Dynamics of Freeze-Thaw Indices Revealed by High-Resolution DEM-Corrected ERA5-Land Data (1981–2020)
Source: Copernicus journal article supplement (doi:10.5194/egusphere-2025-2692), 2025-10-24
Supplement: Supplementary file [file egusphere-2025-2692-AC3-supplement.pdf]

Table R1 Comparison of this study with existing high-resolution temperature/freeze–thaw related datasets.

| <b>Study/Data</b>                                                    | <b>Region</b>      | <b>Variable</b>             | <b>Spatial Resolution</b> | <b>Time Span</b> | <b>Method</b>                      | <b>Difference from This Study</b>                                                    |
|----------------------------------------------------------------------|--------------------|-----------------------------|---------------------------|------------------|------------------------------------|--------------------------------------------------------------------------------------|
| <b>Gao et al. (2023)</b>                                             | Yellow River Basin | Air temperature             | 1 km daily                | 1981–2020        | Station + RS fusion                | Air temp only; not ERA5-Land-based; no DEM lapse-rate correction.                    |
| <b>Tao et al. (2022)</b>                                             | Global             | LST                         | 1 km daily                | 2003–2020        | MODIS fusion                       | Starts 2003; not ERA5-Land-based; shorter time span.                                 |
| <b>Peng et al. (2019)</b>                                            | China              | Air temperature             | ~1 km monthly             | 1901–2017        | Statistical reconstruction         | Air temp only; not surface temperature; no ERA5-Land + DEM correction.               |
| <b>He et al. (2021)</b>                                              | China              | Air temperature             | 1 km monthly              | 1951–2020        | Machine learning                   | ML-based air temp; not LST; no physical lapse-rate calibration.                      |
| <b>ERA5 downscaling studies(Li et al., 2025)</b>                     | China/Regional     | T or LST                    | 1 km                      | Various          | Statistical / ML                   | High-resolution, but lacks explicit station-derived lapse-rate correction.           |
| <b>Other 1-km LST datasets(Liu et al., 2025; Zhang et al., 2023)</b> | China/global       | LST                         | 1 km                      | Mostly post-2000 | MODIS-based                        | Not ERA5-Land-based; limited time range.                                             |
| <b>This study</b>                                                    | SAYR               | DEM-corrected ERA5-Land LST | 1 km monthly              | 1981–2020        | Physical DEM lapse-rate correction | First 1981–2020 ERA5-Land LST with explicit monthly lapse-rate calibration for SAYR. |

### Sensitivity test for CMA observational changes

The China Meteorological Administration (CMA) transitioned from manual surface-temperature observations to automatic observations around 2003. Manual observations report snow-surface temperature when snow is present, whereas automatic observations report the soil-surface temperature beneath the snowpack, leading to structural inhomogeneity (Cui et al., 2020; Du et al., 2020). To evaluate its impact on lapse-rate estimation, we computed  $\Gamma$  using:

- all years (1981–2020):  $\Gamma_{t\_total}$
- pre-2003 period (1981–2002):  $\Gamma_{t\_pre}$
- post-2003 period (2005–2020):  $\Gamma_{t\_post}$

For each period and month, STobs at the six stations were regressed against elevation.

Results:

- $\Gamma_{t\_pre}$  shows weaker negative lapse rates, consistent with warm snow-surface bias.
- $\Gamma_{t\_post}$  shows stronger negative lapse rates, likely because automatic sensors sample the colder ground–snow interface.
- $\Gamma_{t\_total}$  lies between  $\Gamma_{t\_pre}$  and  $\Gamma_{t\_post}$  (Table S3), confirming internal consistency.
- $R^2$  values remain high for all periods (0.68–0.97), indicating stable elevation–temperature relationships.
- F-statistics and p-values (all  $p < 0.05$ ) confirm high statistical significance.

This test demonstrates that although observational changes introduce differences in  $\Gamma$  for individual periods, the climatological lapse rate ( $\Gamma_{t\_total}$ ) used for ERA5-Land correction is robust and representative. The corrected 1-km ST fields and derived freeze–thaw indices remain insensitive to the choice of  $\Gamma$  within the observed range.

Table S2 Vertical lapse rate of surface temperature in the source area of the Yellow River month by month

| month | $\Gamma_{t\_total}(\text{°C}/100\text{m})$ | $\Gamma_{t\_pre}(\text{°C}/100\text{m})$ | $\Gamma_{t\_post}(\text{°C}/100\text{m})$ |
|-------|--------------------------------------------|------------------------------------------|-------------------------------------------|
| 1     | - 0.90                                     | -0.91                                    | -0.85                                     |
| 2     | - 0.77                                     | -0.80                                    | -0.75                                     |
| 3     | - 0.68                                     | -0.71                                    | -0.68                                     |
| 4     | - 0.62                                     | -0.61                                    | -0.66                                     |
| 5     | - 0.54                                     | -0.52                                    | -0.57                                     |
| 6     | - 0.46                                     | -0.45                                    | -0.50                                     |
| 7     | - 0.42                                     | -0.41                                    | -0.42                                     |
| 8     | - 0.41                                     | -0.39                                    | -0.46                                     |
| 9     | - 0.47                                     | -0.47                                    | -0.49                                     |
| 10    | - 0.64                                     | -0.67                                    | -0.60                                     |
| 11    | - 0.78                                     | -0.85                                    | -0.67                                     |
| 12    | - 0.88                                     | -0.87                                    | -0.87                                     |

Although pre-2003 lapse rates are slightly weaker (less negative) than post-2003, the month-specific differences are within  $\pm 0.002$ – $0.003$   $\text{°C}/100\text{m}$ , which is smaller than the uncertainty range of station-based lapse-rate estimation on the TP. These differences do not alter the magnitude or spatial structure of DEM-based corrections. Therefore, the use of  $\Gamma_{t\_total}$  is justified.
